# Supplementary material
Source: PubMed Central journal article supplement (PMC2724327)

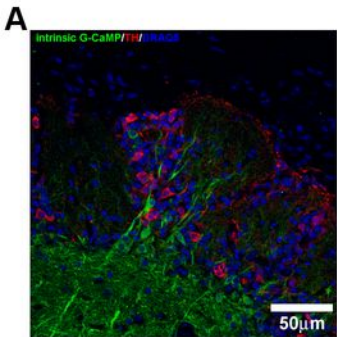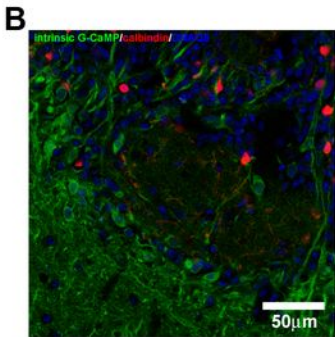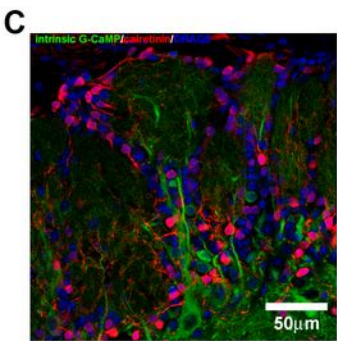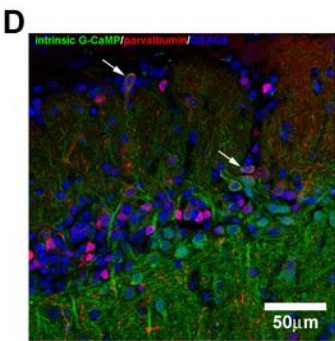

Supplement: supp_00020.2009_figS1.pdf [file supp_00020.2009_figS1.pdf]

A

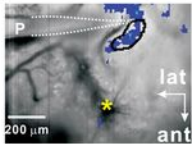

B

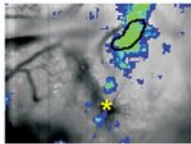

C

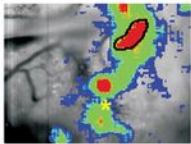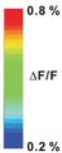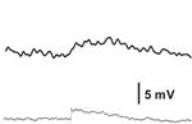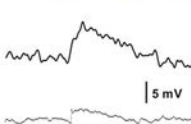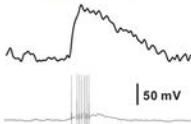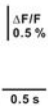

Supplement: supp_00020.2009_figS2.pdf [file supp_00020.2009_figS2.pdf]

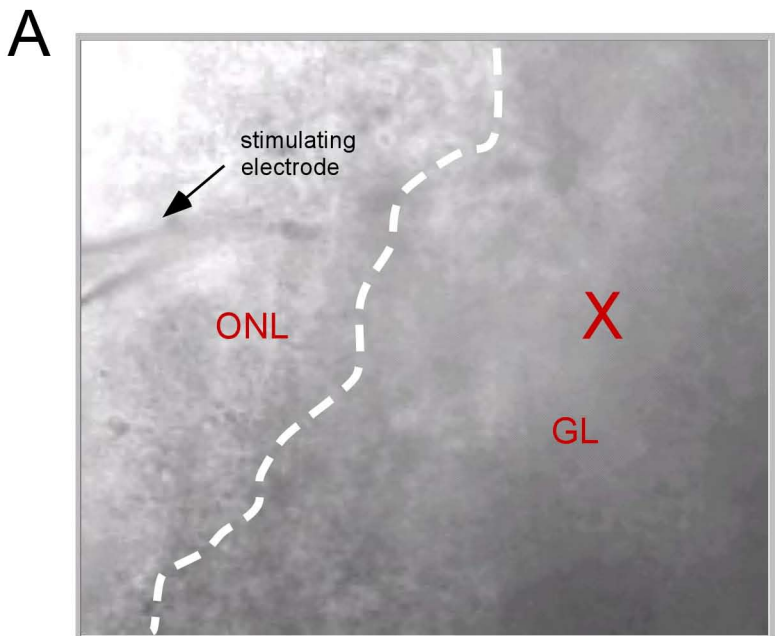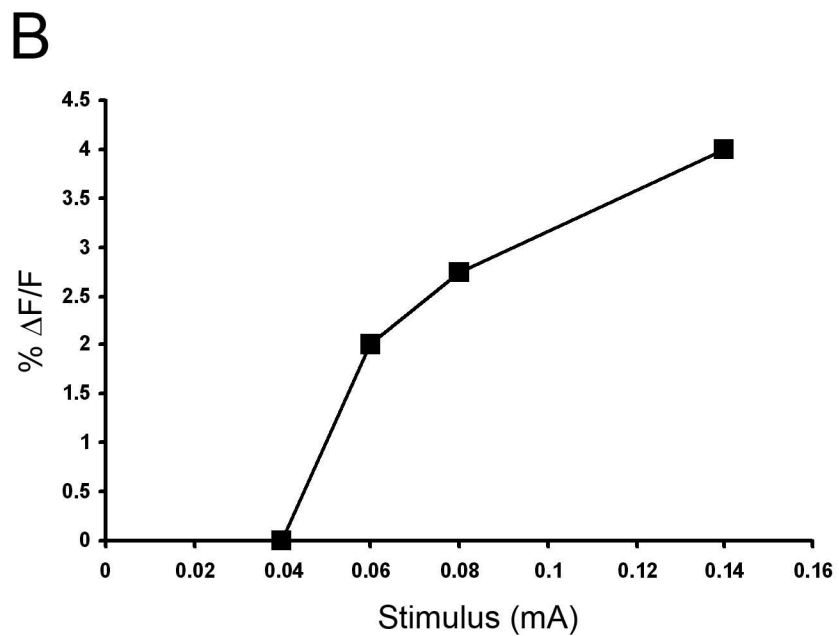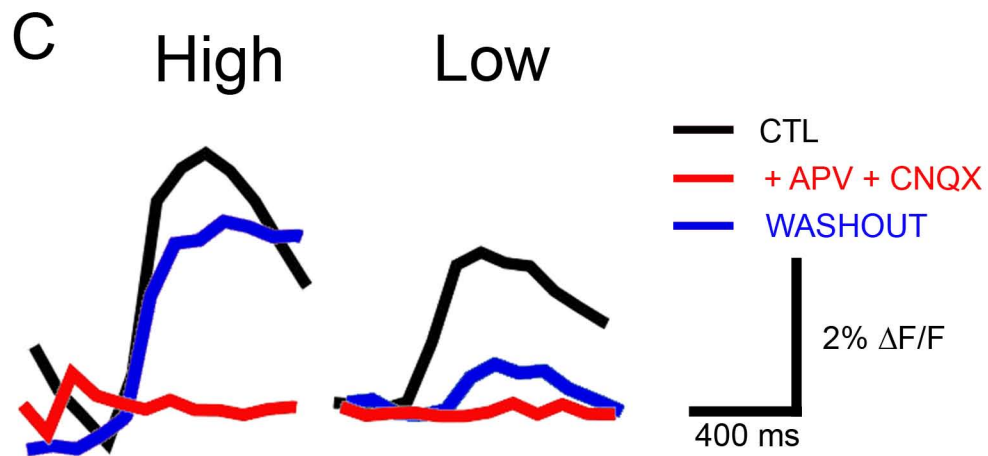

Supplement: supp_00020.2009_figS3.pdf [file supp_00020.2009_figS3.pdf]
